# Supplementary material for: Folic acid-conjugated organically modified silica nanoparticles for enhanced targeted delivery in cancer cells and tumor in vivo
Source: Royal Society of Chemistry journal article supplement (doi:10.1039/c5tb00587f), 2015-01-01
Supplement: c5tb00587f1.pdf [file c5tb00587f1.pdf]

**Folic acid-conjugated organically modified silica nanoparticles for enhanced targeted delivery in cancer cells and tumor in vivo**

Feng Yin,<sup>a#</sup> Butian Zhang,<sup>a#</sup> Shuwen Zeng,<sup>a,e</sup> Guimiao Lin,<sup>c</sup> Jinglin Tian,<sup>c</sup> Chengbin Yang,<sup>a</sup> Kuan Wang,<sup>d\*</sup> Gaixia Xu,<sup>b\*</sup> and Ken-Tye Yong<sup>a\*</sup>

<sup>a</sup> School of Electrical and Electronic Engineering, Nanyang Technological University, Singapore 639798, Singapore Email: [ktyong@ntu.edu.sg](mailto:ktyong@ntu.edu.sg)

<sup>b</sup> The Key Lab of Optoelectronics Devices and Systems of Ministry of Education/ Guangdong Province, College of Optoelectronic Engineering, Shenzhen University, Shenzhen, 518060, China Email: [xugaixia@szu.edu.cn](mailto:xugaixia@szu.edu.cn)

<sup>c</sup> The key lab of Biomedical Engineering and Research Institute of Uropoiesis and Reproduction, School of Medical Sciences, Shenzhen University, Shenzhen, 518060, China

<sup>d</sup> Nanomedicine Program and Institute of Biological Chemistry, Academia Sinica, Nankang, Taipei 115, Taiwan Email: [wangk@gate.sinica.edu.tw](mailto:wangk@gate.sinica.edu.tw)

<sup>e</sup> CINTRA CNRS/NTU/THALES, UMI 3288, Research Techno Plaza, 50 Nanyang Drive, Border X Block, Singapore, 637553

# These authors contributed equally to this work

## Supplementary Information

### Figures and Figure legends

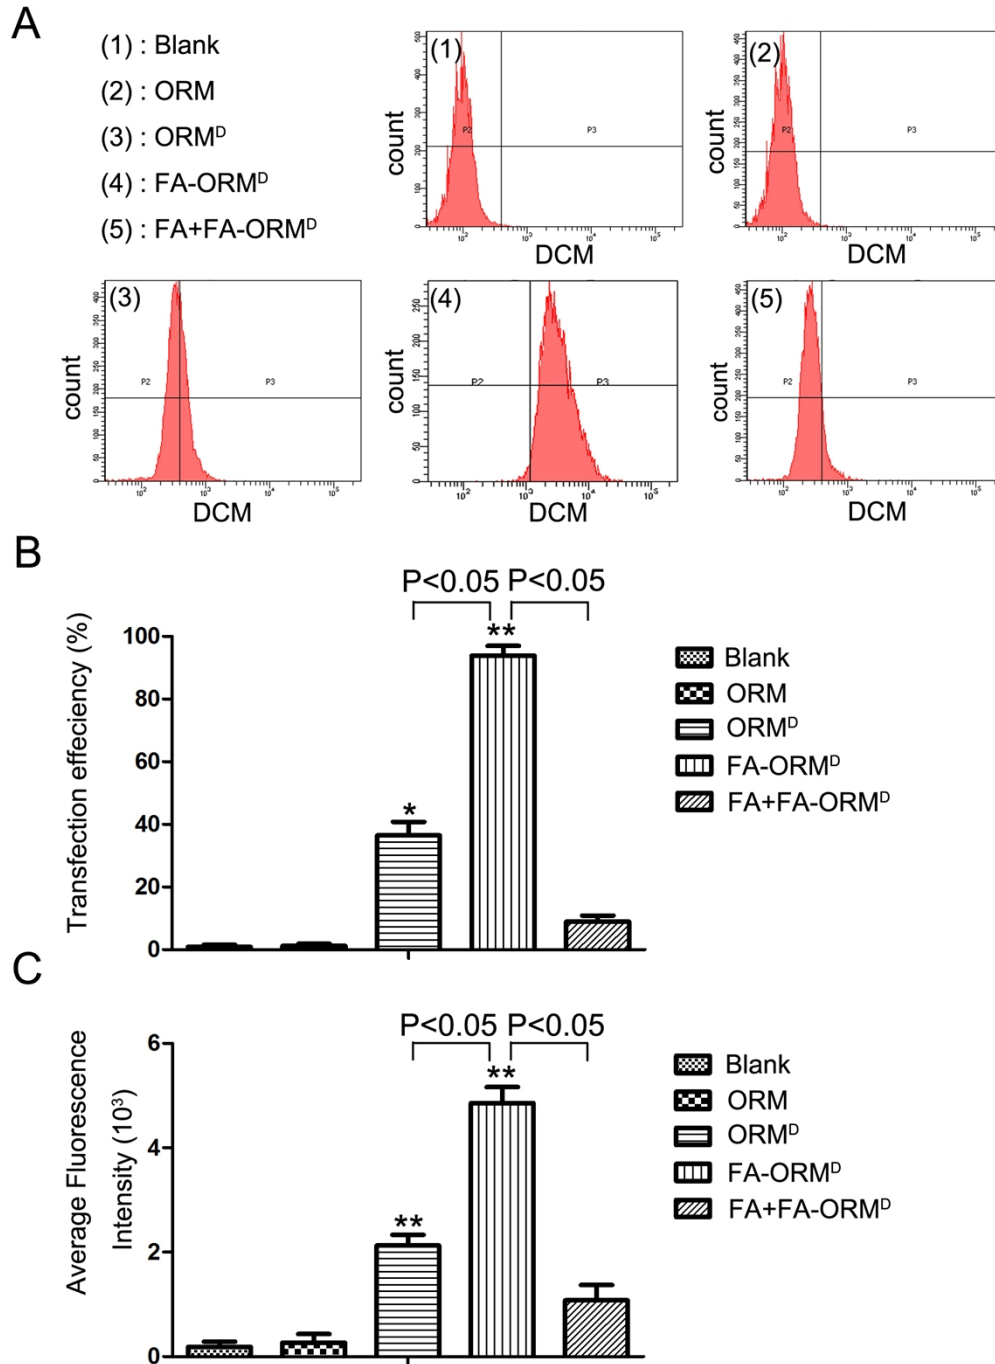

**Supplementary Figure S1: Transfection efficiency of the ORMOSIL nanoparticles in SMMC7721 cells.** (A) Representative dots plots of flow cytometry assays, in which cells were treated with (1) PBS, (2) ORM nanoparticles, (3) ORM<sup>D</sup>

nanoparticles, (4) FA-ORM<sup>D</sup> nanoparticles and (5) FA followed by FA-ORM<sup>D</sup> nanoparticles. **(B)** Transfection efficiency and **(C)** average fluorescence intensity calculated from the results showed in **(A)**. Values are means  $\pm$  SEM,  $n = 3$ ; \* $P < 0.05$ , \*\* $P < 0.01$  vs Blank (PBS) and ORM.

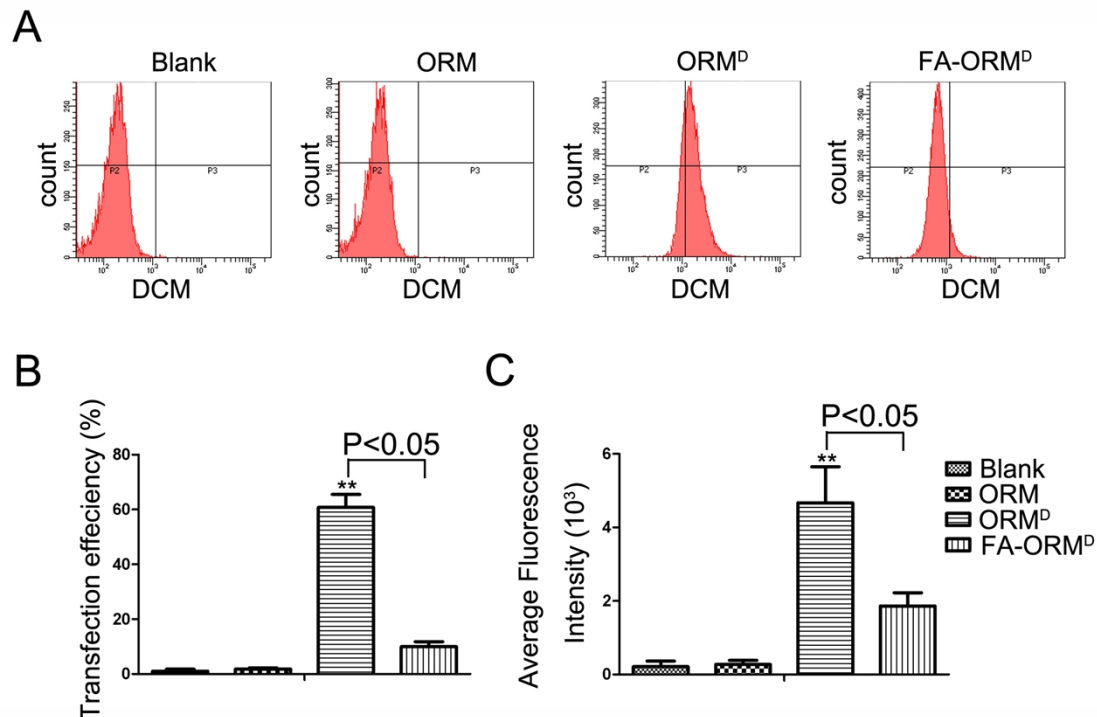

**Supplementary Figure S2: Transfection efficiency of the ORMOSIL nanoparticles in MCF7 cells.** **(A)** Representative dots plots of flow cytometry assays, in which cells were treated with (1) PBS, (2) ORM nanoparticles, (3) ORM<sup>D</sup> nanoparticles and (4) FA-ORM<sup>D</sup> nanoparticles. **(B)** Transfection efficiency and **(C)** average fluorescence intensity calculated from the results showed in **(A)**. Values are means  $\pm$  SEM,  $n = 3$ ; \*\* $P < 0.01$  vs Blank (PBS) and ORM.
